# 1        **Information-based summary statistics for spatial genetic structure** 2                                                    **inference**

3                                                    Xinghu Qin<sup>1\*</sup>, Oscar E. Gaggiotti<sup>1\*</sup>

4        <sup>1</sup> Centre for Biological Diversity, Sir Harold Mitchell Building, University of St Andrews,  
5        Fife, KY16 9TF, UK

6        \* Correspondence to: XQ [xq5@st-andrews.ac.uk](mailto:xq5@st-andrews.ac.uk) and OEG [oeg@st-andrews.ac.uk](mailto:oeg@st-andrews.ac.uk)

7

8

9

10

11

12

13

14

15

16

## 17 Abstract

- 18 1. Inference of spatial patterns of genetic structure often relies on parameter estimation  
19 and model evaluation using a set of summary statistics (SS) that summarise the  
20 information present in the data. An important subset of these SS is best described as  
21 diversity indices, which are based on information theory principles that can be  
22 classified as belonging to three different ‘families’ encompassing a spectrum of  
23 information measures,  ${}^qH$ . These include the richness family of order  $q = 0$ ,  ${}^{Ar}SS$ ; the  
24 Shannon family of order  $q = 1$ ,  ${}^HSS$ ; and the heterozygosity family of order  $q = 2$ ,  
25  ${}^{He}SS$ . Although commonly used by ecologists, the Shannon family has been rather  
26 neglected by population geneticists and evolutionary biologists. However, recent  
27 population genetic studies have advocated their use, yet the power of these SS for  
28 spatial structure discrimination has not been systematically assessed.
- 29 2. In this study, we performed a comprehensive assessment of the three families of SS,  
30 as well as a fourth family consisting of SS belonging to the Shannon family but  
31 expressed in terms of Hill numbers ( ${}^{1D}SS$ ), for spatial structure inference using  
32 simulated microsatellites data under typical spatial scenarios. To give an unbiased  
33 evaluation, we used three machine learning methods, Kernel Local Fisher  
34 discriminant analysis (KLFDA), random forest classification (RFC), and deep neural  
35 network (DL), to test the performance of different SS to discriminate between spatial  
36 scenarios, and then identified the most informative metrics for discriminatory power.
- 37 3. Results showed that the SS family of order  $q = 1$  expressed in terms of Hill numbers,  
38  ${}^{1D}SS$ , outperformed the other two families ( ${}^{Ar}SS$ ,  ${}^{He}SS$ ) as well as the untransformed  
39 Shannon entropy ( ${}^HSS$ ) family. Jaccard dissimilarity ( $J$ ) and its Mantel’s  $r$  showed the

40 highest discriminatory power to discriminate all spatial scenarios, followed by  
41 Shannon differentiation  $\Delta D$  and its Mantel's  $r$ .  
42 4. Information-based summary statistics, especially the diversity of order  $q = 1$  and  
43 Shannon differentiation measures, can increase the power of spatial structure  
44 inference. In addition, different sets of SS provide complementary power for  
45 discriminating between spatial scenarios.

46 **Keywords:** spatial structure, information-based statistics, population genetics.

47

48

49

50

51

52

53

54

55

56

57

58

## 59 Introduction

60 Spatial biodiversity patterns generated by different evolutionary and demographic processes  
61 can be observed at the ecological or species level and, at the genetic or molecular level (Van  
62 Tienderen 1991; Novembre & Stephens 2008; Fortuna *et al.* 2009; Wang *et al.* 2011; Stotz,  
63 Gianoli & Cahill 2016). However, metrics and approaches to describe these spatial patterns  
64 and to infer the underlying processes differ greatly between these two biodiversity levels. The  
65 metrics used to study ecological variation (species) and genetic variation (alleles) are mainly  
66 dominated by the traditional indices in their own domains, such as species richness, Shannon  
67 index in ecology, and allelic richness, heterozygosity in population genetics. These indices  
68 comprise a spectrum of information measures ( $q$  profile,  ${}^qH$ ; (Hill 1973; Jost 2006)),  
69 including richness ( $q=0$ ,  $S$ ), Shannon entropy ( $q=1$ ,  $H$ ), and heterozygosity (or Gini-Simpson  
70 index,  $q=2$ ,  $He$ ). Each index of order  $q$  provides a different type of information, with the  
71 index of order  $q=0$  emphasising rare elements, the index of order  $q=2$  emphasising common  
72 elements, while the index of order  $q=1$  measuring uncertainty in proportion to their  
73 frequency, neither preferring rare elements nor common elements (Sherwin *et al.* 2017).  
74 However,  $q=1$  family only received sporadic attention in population genetics.

75 The use of summary statistics has facilitated our understanding of ecology and evolution in  
76 terms of describing spatial biodiversity patterns (e.g., Distance-Decay (Nekola & White  
77 1999)), and examining likely processes underlying them. Typically, this is done by  
78 decomposing total diversity ( $\gamma$ -diversity) into within-aggregate ( $\alpha$ -diversity) and between  
79 aggregates ( $\beta$ -diversity) based on species' or community spatial aggregation (Lande 1996;  
80 Ricotta 2005). The derived  $\beta$ -diversity is then used to examine the dissimilarity or  
81 differentiation between aggregates. Two main decomposition methods have been used to do  
82 this, multiplicative ( $SS_\gamma = SS_\beta * SS_\alpha$ ) and additive ( $SS_\gamma = SS_\beta + SS_\alpha$ ) decomposition (Ricotta  
83 2005). The desirable  $\beta$ -diversity should be additive when pooling or partitioning the

84 aggregates and should represent the actual proportion of non-shared elements (true  
85 dissimilarity or differentiation) due to divergence or differentiation between aggregates  
86 (Chao, Chiu & Jost 2014).  $\beta$ -measures additively decomposed from  $q=0$  (e.g., Jaccard  
87 dissimilarity) don't measure true dissimilarity, because they only count presence and absence  
88 ignoring the abundance or frequency of elements.  $\beta$ -measures of order  $q = 2$ , the well-known  
89 fixation index,  $F_{ST}$  family (including  $F_{ST}$ ,  $G_{ST}$  etc.) derived from the multiplicative  
90 decomposition of heterozygosity ( $He$ ), don't measure true differentiation (true dissimilarity)  
91 and are not independent of  $\alpha$ -diversity or  $\gamma$ -diversity (Jost 2008; Ma, Ji & Zhang 2015). On  
92 the other hand,  $\beta$ -measures based on Shannon entropy (order  $q = 1$ , the Shannon  
93 differentiation,  $\Delta D$ ), measure true differentiation and satisfy monotonicity without  
94 dependence problem (Gaggiotti *et al.* 2018), which are desirable metrics for measuring  
95 differentiation.

96 A common difficulty faced when measuring biodiversity with standard metrics is that, with  
97 the exception of richness, they do not have an intuitive interpretation in terms of the number  
98 of effective elements in the system (Jost 2006). However, this problem is easily overcome by  
99 using Hill numbers (Hill 1973), and this is the approach we use in the present study. Thus,  
100 allelic richness is represented by  ${}^0D$  while the effective number of alleles based on Shannon  
101 entropy and heterozygosity are given by  ${}^1D$  and  ${}^2D$  respectively.

102 Diversity at one level of biological organization (community, species) may sustain the  
103 diversity at the other (Lankau & Strauss 2007). Thus, in addition to describing diversity  
104 patterns, researchers have made substantial efforts to unify the two levels of biodiversity  
105 (species diversity of ecological communities and genetic diversity of populations) and to  
106 reveal ecological and evolutionary processes underpinning their spatial patterns (Vellend  
107 2005). However, these so-called Species-Genetic-Diversity-Correlation (SGDC) studies have  
108 rarely measured the two types of diversity consistently (Gaggiotti *et al.* 2018). Integrative

109 studies of species and genetic diversity, and the ecological factors underlying their  
110 association or lack thereof using the same type of index would contribute to a better  
111 understanding of eco-evolutionary dynamics.

112 The use of informative diversity metrics is crucial, not only for detecting changes in  
113 biodiversity patterns but also for understanding the demographic and evolutionary history of  
114 species (Csilléry *et al.* 2010). The performance of population genetics summary statistics has  
115 been thoroughly evaluated in the context of spatial demographic inference (Alvarado-Serrano  
116 & Hickerson 2016) and similar studies are needed for equivalent statistics based on Shannon  
117 entropy. The present study represents the first step in this direction by evaluating the power  
118 of the information-based diversity measures (represented by  ${}^1D$  and Shannon differentiation,  
119  $\Delta D$ ) and comparing it with that of traditional measures (represented by allelic richness,  
120 heterozygosity, and their  $\beta$ -diversity measures) to discriminate between spatial scenarios  
121 using recent state-of-the-art machine learning approaches.

122 We simulated microsatellite data under five spatial scenarios that include panmixia, finite  
123 island model, hierarchical island model, stepping-stone model and hierarchical stepping-stone  
124 model, which are the typical spatial demographic models that have been used to describe the  
125 spatial structure of natural populations in fragmented landscapes. We employed three state-  
126 of-the-art machine learning approaches, kernel local discriminant analysis (KLFDA),  
127 conditional random forest classification, and deep neural networks (*DNN*) to characterize the  
128 behaviour of these diversity metrics for discriminating different spatial scenarios. Our results  
129 showed that information-based summary statistics can provide more power than traditional  
130 measures to make inferences about spatial genetic structure.

## 131 **Methods**

132 To evaluate the ability of the new SS and traditional SS in discriminating different spatial  
133 scenarios, we simulated five spatial scenarios that encompass hierarchical and non-  
134 hierarchical population structures using coalescent simulations. More specifically, we  
135 considered populations without hierarchical structure and populations structured into three  
136 hierarchical levels, ecosystem, aggregate (e.g., region) and sub-aggregate (e.g., population)  
137 level.

138 We calculated the traditional and new summary statistics from these scenarios and then used  
139 the state-of-the-art machine learning approaches to test their power to discriminate among  
140 spatial scenarios.

#### 141 **Models and model parameters**

142 We considered five spatial scenarios, panmixia, island model, hierarchical island model,  
143 stepping-stone model, and hierarchical stepping-stone model. Instead of using fixed values  
144 for the parameters, we sampled them from probability distributions. Table 1 presents all  
145 scenarios and the respective parameter distributions used in the simulations. For the island  
146 model, stepping-stone model, hierarchical island model and hierarchical stepping-stone  
147 model, each scenario consisted of 16 populations with population size sampled from  
148  $U(100, 1000)$ . For the panmixia model, we simulated one panmictic population, with  
149 population size drawn from  $U(1600, 16000)$ . The hierarchical island models consist of four  
150 regions with each region comprising 4 populations. In terms of the hierarchical stepping-  
151 stone models, we simulated two regions with each region comprising 8 populations. We  
152 assume a stepwise mutation model with a constant mutation rate of  $5 \times 10^{-4}$  for all scenarios.  
153 In the case of the non-hierarchical scenarios (island model and stepping-stone model), the  
154 migration rate,  $m$ , was drawn from a uniform distribution  $U(0.001, 0.1)$ . In the case of the  
155 hierarchical scenarios, migration rates between pairs of populations within regions were

156 sampled from  $U(0.001, 0.1)$  and migration rates between populations from different regions  
157 were sampled from  $U(0.00005, 0.005)$ .

## 158 **Simulations**

159 The coalescent-based simulator fastsimcoal2 (Excoffier & Foll 2011; Excoffier *et al.* 2013)  
160 was used to generate microsatellite synthetic data under the five scenarios described above.  
161 For each of these five spatial scenarios, we simulated 10 independent microsatellite loci  
162 sharing the same mutation rate. 100 sets of parameters (100 simulations) were randomly  
163 drawn from prior distributions, and each parameter set was used to generate 1000 replicate  
164 data sets. We sampled 20 individuals per population under each spatial model (standard and  
165 hierarchical versions of the island and stepping-stone models). In the case of the panmixia  
166 model, we sampled 320 individuals and then randomly partitioned them into 16 samples  
167 consisting of 20 individuals each to obtain a set of samples equivalent to those of the other  
168 four scenarios.



169 **Table 1.** Parameters used in the simulations. In the case of the panmixia scenario, we simulated a single population but generated 16 samples at  
 170 random. In the case of the hierarchical models, we indicate the number of populations per region in parenthesis.

| Scenarios                   | Regions     | Number of populations | Population size  | Sample size | Migration rate                                                            | Mutation rate      | Number of loci |
|-----------------------------|-------------|-----------------------|------------------|-------------|---------------------------------------------------------------------------|--------------------|----------------|
| Panmixia                    | 1           | 1 (16) *              | $U(1600, 16000)$ | 320         |                                                                           | $5 \times 10^{-4}$ | 10             |
| Island model                | 1           | 16                    | $U(100, 1000)$   | 20          | $U(0.001, 0.1)$                                                           | $5 \times 10^{-4}$ | 10             |
| Hierarchical island model   | 4 (4,4,4,4) | 16                    | $U(100, 1000)$   | 20          | $m_{\text{within}}: U(0.001, 0.1)$<br>$m_{\text{between}}: U(5E-5, 5E-3)$ | $5 \times 10^{-4}$ | 10             |
| Stepping-stone              | 1           | 16                    | $U(100, 1000)$   | 20          | $U(0.001, 0.1)$                                                           | $5 \times 10^{-4}$ | 10             |
| Hierarchical stepping-stone | 2 (8,8)     | 16                    | $U(100, 1000)$   | 20          | $m_{\text{within}}: U(0.001, 0.1)$<br>$m_{\text{between}}: U(5E-5, 5E-3)$ | $5 \times 10^{-4}$ | 10             |

171

172

## 173 Summary Statistics

174 We chose the commonly used genetic diversity indices, allelic richness ( $A_r$ , noted  $^{Ar}SS$   
175 hereafter) and heterozygosity ( $H_e$ , noted  $^{He}SS$  hereafter) as well as their corresponding  $\beta$ -  
176 diversity measures, Jaccard dissimilarity (Jaccard 1912) and fixation index (Weir &  
177 Cockerham 1984), as the traditional summary statistics. The allelic richness and expected  
178 heterozygosity were partitioned into three hierarchical levels, population level, regional level  
179 and ecosystem level, with the corresponding measures being,  $A_r^P$  (allelic richness at the  
180 population level),  $A_r^R$  (allelic richness at the regional level),  $A_r^T$  (total allelic richness in the  
181 ecosystem) and  $H_e^P$  (expected heterozygosity at the population level),  $H_e^R$  (expected  
182 heterozygosity at the regional level),  $H_e^T$  (total heterozygosity in the ecosystem).  
183 Accordingly, the  $\beta$ - measures were partitioned into  $J_r^P$  (Jaccard dissimilarity among  
184 populations within a region) and  $J_r^R$  (Jaccard dissimilarity among regions within an  
185 ecosystem) for allelic richness, and  $F_{ST}^P$  ( $F_{ST}$  among populations within a region) and  $F_{ST}^R$  ( $F_{ST}$   
186 among regions within an ecosystem) for expected heterozygosity.

187 We chose the diversity of order  $q=1$ , the transformed Shannon “effective number”-  $^1D$ , as  
188 well as Shannon differentiation ( $\Delta D$ ) as the new summary statistics ( $^1DSS$ ).  $^1D$  was also  
189 decomposed into population level, regional level and ecosystem level, which were  $D_\gamma$ ,  $D_\alpha^2$ ,  
190  $D_\alpha^1$ , respectively. The equivalent number of regions and the equivalent number of  
191 populations thus were  $D_\beta^2$ ,  $D_\beta^1$ , respectively. In the same way, the allelic differentiation  $\Delta D$   
192 was decomposed into differentiation among populations within a region ( $\Delta D^1$ ), and  
193 differentiation among regions within an ecosystem ( $\Delta D^2$ ). The details about the equations for  
194 diversity decomposition can be found in Gaggiotti *et al*, (2018).

195 As Shannon entropy avoids undue emphasis on either rare or common alleles (Sherwin *et al*.  
196 2017), it is increasingly used in evolutionary biology and molecular ecology as a measure of

197 genetic diversity and evolvability (Hampe, Schreiber & Krawczak 2003; Day 2015; Wagner  
198 2017). Therefore, we also use summary statistics based on Shannon entropy ( ${}^1H$ ,  ${}^HSS$   
199 hereafter) for comparison with diversity measures ( ${}^1DSS$ ). Shannon entropy per population  
200 ( ${}^HP$ ), per region ( ${}^HR$ ), and total Shannon entropy ( ${}^HT$ ) were calculated in line with the same  
201 hierarchies above. The additive decomposition of Shannon beta entropy ( ${}^H\beta = H_\gamma - H_\alpha$ ), was  
202 estimated at the population level ( ${}^H\beta^1$ ) and regional level ( ${}^H\beta^2$ ) as well. Here, we also  
203 included Shannon differentiation ( $\Delta D$ ) to keep the number of statistics in  ${}^HSS$  the same with  
204  ${}^1DSS$ .

205 In addition, we also calculated Mantel's  $r$ , the correlation coefficient between genetic  
206 distance and geographical distance for  $\beta$ - measures ( $\rho_{J,d}$ ,  $\rho_{\Delta D,d}$ ,  $\rho_{F_{ST},d}$ ), with distance  
207 measured in terms of the number of steps (edges) separating any two populations (vertices).  
208 Each set of summary statistics includes the mean and standard deviation ( $SD$ ). For each  
209 measure at the population level, we calculated the value for each population and the mean  
210 across populations. The total number of summary statistics for  ${}^{Ar}SS$  is 44, the same as for  
211  ${}^{He}SS$ . The total number of summary statistics for  ${}^1DSS$  is 48 the same number as for  ${}^HSS$ .  
212 The description of summary statistics is shown in Table S1.

### 213 **Data analysis**

214 The pipelines (R functions) to calculate the summary statistics are wrapped in the R package  
215 *HierDpart* (Qin 2019). We built 9 subsets of summary statistics,  ${}^{Ar}SS$ ,  ${}^HSS$ ,  ${}^{He}SS$ ,  ${}^1DSS$ ,  
216  ${}^{Ar+He}SS$ ,  ${}^{H+1D}SS$ ,  ${}^{Ar+H+He}SS$ ,  ${}^{Ar+He+1D}SS$ ,  ${}^{Ar+H+He+1D}SS$ , for the discriminatory power  
217 test.

## 218 **The power of summary statistics to discriminate among spatial scenarios**

219 The power assessed by various machine learning methods may differ. Thus, to ensure that our  
220 tests are as comprehensive as possible, we employed three current state-of-the-art approaches  
221 to evaluate the power of the different subsets of summary statistics to discriminate among  
222 spatial structure scenarios: Kernel Local Fisher discriminant analysis (KLFDA; (Sugiyama  
223 2007), conditional random forest classification (CRFC; (Strobl *et al.* 2007), and deep neural  
224 network (Ripley & Hjort 1996).

### 225 **Kernel Local Fisher Discriminant Analysis (KLFDA)**

226 KLFDA is a recently proposed method for supervised dimensionality reduction based on  
227 local Fisher discriminant analysis (LFDA, Sugiyama 2006). As opposed to the standard  
228 Fisher discriminant analysis (LDA), LFDA can separate different classes (e.g. genetic  
229 clusters) while preserving the within-class structure (Sugiyama 2007); in other words, it  
230 allows for genetic sub-structuring within clusters. KLFDA represents an extension of LFDA  
231 that considers non-linear boundaries between classes through a nonlinear mapping of data  
232 points onto a reproducing kernel Hilbert space.

233 We carried out KLFDA on the 9 subsets of summary statistics. The Gaussian kernel was  
234 chosen for kernel transformation. Three key hyperparameters impact the accuracy of  
235 KLFDA,  $d$ , the number of reduced features for discriminant analysis,  $\sigma$ , the radius (the  
236 standard deviation) of the Gaussian kernel, and  $knn$ , the number of nearest neighbours. We  
237 first determined the appropriate number of reduced features ranging from 5 to 50 based on  
238 classification accuracy during training. We then did fine hyperparameter tuning on  $\sigma$  and  $knn$   
239 via cross-validation with the best number of reduced features selected in the first step.  $\sigma$  value  
240 was tuned considering values between 0.001- 10 (0.001, 0.005, 0.01, 0.05, 0.1, 0.5, 1, 5, 10)  
241 and  $knn$  was tuned between 5- 50 (5, 10, 15, 20, 25, 30, 35, 40, 45, 50). Discriminatory power

242 was evaluated by the classification accuracy (proportion of the overall correct discrimination)  
243 via leave-one-out cross-validation (Schaffer 1993; Kohavi 1995). Analyses were  
244 implemented using R package *lfda* (Tang & Li 2016; Tang & Li 2017).

### 245 **Conditional Random Forest Classification (CRFC)**

246 We conducted the unbiased random forest classification based on conditional inference trees  
247 (*cforest*) that adopt the subsampling validation process with unbiased variable selection  
248 (bootstrap without replacement; (Strobl *et al.* 2007). To avoid overfitting in random forest  
249 classification, we optimized the key parameter (*mtry*) that governs the number of features that  
250 are randomly chosen to grow each tree from the bootstrapped data. We tuned the parameter  
251 *mtry* [ $mtry \in (1: n)$ ,  $n$  is the number of variables] via leave-one-out validation with 1000 trees  
252 for each subset of summary statistics. The parameter with the lowest average prediction error  
253 was chosen as the final model.

254 The standardized conditional importance of each variable, measured by the mean decrease in  
255 accuracy (MDA), was estimated from the optimum model based on bootstrapping without  
256 replacement according to (Strobl *et al.* 2008). Analyses were implemented using the R  
257 package “*caret*” (Kuhn 2015) calling *cforest* function from *party* package (Hothorn *et al.*  
258 2010).

### 259 **Deep neural network**

260 We conducted neural network (Baum 1988; Guarnieri, Piazza & Uncini 1999) classification  
261 using a 3 hidden layers perceptron (MLP) feedforward network with a weight decay to test  
262 the performance of the above subsets of summary statistics for spatial structure inference.  
263 The deep neural network training was carried out through a backpropagation with weighted  
264 decay optimization (a procedure to repeatedly adjust the weights to minimize the difference

265 between true values and observed values) and a non-linear activation function (logistic) at the  
266 output layer. We first did a grid search on the parameter space via cross-validation to  
267 minimize the parameter range, then we tuned the parameters through dense parameter  
268 combinations via leave-one-out cross-validation. Finally, we tuned the number of neurons in  
269 each hidden layer using: layer1 = (1, 5, 10, 15); layer2= (0, 5, 10, 15); layer3= (0, 5, 10, 15),  
270 and the rate of decay using: decay = (0, 1e-5, 1e-4, 1e-3, 1e-2, 1e-1). Final model  
271 performance was evaluated by the model accuracy and Cohen's Kappa coefficient (Cohen  
272 1960). Models with the highest accuracy were chosen as the optimal model.

273 The (overall) importance of summary statistics is determined based on Garson's algorithm  
274 (Garson 1991; Gevrey, Dimopoulos & Lek 2003), which uses combinations of the absolute  
275 values of the weights. We also used neural networks to assess the importance of summary  
276 statistics to identify a specific scenario. Deep neural network models were built using *caret*  
277 package (Kuhn 2008; Kuhn 2012).

### 278 **Evaluating discriminatory power of different sets of summary statistics**

279 In terms of KLFDA, random forest classification, and neural network, we calculated the  
280 confusion matrix as well as overall performance statistics for each set of summary statistics.  
281 These model metrics are presented in Supplementary Material. Overall performance statistics  
282 included model accuracy and Kappa. All the performance statistics were estimated using the  
283 best model after leave-one-out cross-validation. The detailed description of these statistics  
284 can be found in (Kuhn & Johnson 2013).

285 We compared the performance of different sets of summary statistics in discriminating the  
286 five spatial scenarios using each of the above-mentioned methods separately to identify the  
287 best set of summary statistics.

288 **Results**

289 **KLFDA inference**

290 Table 2 presents the overall performance of different sets of summary statistics in  
 291 discriminating five spatial scenarios using KLFDA. The best performing statistics set should  
 292 have the highest accuracy and the largest Kappa value. Results indicated that  ${}^1D$ SS surpassed  
 293 other sets of summary statistics at discriminating among scenarios and presented the highest  
 294 discriminatory power. Though  ${}^H$ SS did slightly better than  ${}^A$ r SS and  ${}^H$ e SS, it underperformed  
 295  ${}^1D$ SS (Table 2). On the other hand, the set of summary statistics with the lowest  
 296 discriminatory power corresponded to the most commonly used  ${}^H$ eSS in population genetics  
 297 (Table 2).

298 **Table 2.** The overall performance of different sets of summary statistics in discriminating  
 299 five spatial scenarios using KLFDA

| Summary statistics | ${}^A$ rSS       | ${}^H$ SS        | ${}^H$ eSS       | ${}^1D$ SS       | ${}^A$ r+ ${}^H$ eSS | ${}^H$ + ${}^1D$ SS | ${}^A$ r+ ${}^H$ + ${}^H$ eSS | ${}^A$ r+ ${}^H$ e+ ${}^1D$ SS | ${}^A$ r+ ${}^H$ + ${}^H$ e+ ${}^1D$ SS |
|--------------------|------------------|------------------|------------------|------------------|----------------------|---------------------|-------------------------------|--------------------------------|-----------------------------------------|
| Accuracy (Acc)     | 0.934            | 0.936            | 0.908            | <b>0.946</b>     | 0.926                | 0.944               | 0.93                          | 0.944                          | 0.942                                   |
| Acc 95% CI         | (0.9086, 0.9541) | (0.9108, 0.9558) | (0.8792, 0.9319) | (0.9224, 0.9641) | (0.8994, 0.9474)     | (0.9201, 0.9625)    | (0.904, 0.9508)               | (0.9201, 0.9625)               | (0.9178, 0.9608)                        |
| Kappa              | 0.9175           | 0.92             | 0.885            | 0.9325           | 0.9075               | 0.93                | 0.9125                        | 0.93                           | 0.9275                                  |

300 Acc: Accuracy; Acc 95% CI: the 95% interval of accuracy; Kappa: Cohen's kappa coefficient ( $\kappa$ ).

301

302 Figure 1 presents results for the five scenarios based on the first two reduced features from  
 303 KLFDA. Except  ${}^1D$ SS, all other summary statistics, or the combination thereof, either failed

304 to clearly distinguish between panmixia and the island model or failed to clearly distinguish  
305 between the standard stepping-stone model and hierarchical stepping-stone model (Fig. 1A-  
306 I).  ${}^1D$ SS did a better job at discriminating among all of them (Fig. 1D).

307 The confusion matrix supported these results (Table S2). Specifically,  ${}^{Ar}$ SS can correctly  
308 identify the island model, panmixia, and stepping-stone model (100%). But it did worse in  
309 identifying the hierarchical stepping-stone model (Fig. 1B, Table S2).  ${}^H$ SS did better at  
310 identifying hierarchical scenarios but performed less well in the case of the stepping-stone  
311 model (Fig. 1C, Table S2).  ${}^1D$ SS exhibited impressive performance across all scenarios with  
312 the exception of the hierarchical stepping-stone (Fig. 1D, Table S2).  ${}^{He}$ SS performed poorly  
313 in most scenarios with the exception of panmixia and hierarchical island scenarios (Fig. 1E,  
314 Table S2). Combinations of  ${}^1D$ SS with other summary statistics showed similar results to  
315 those obtained with  ${}^1D$ SS alone except when including  ${}^{He}$ SS, in which case discriminatory  
316 power was decreased (Table 2 & S2). In fact, combining  ${}^{He}$ SS with other summary statistics  
317 decreased the discriminatory power. Overall, the hierarchical stepping-stone scenario was the  
318 most difficult to identify correctly.  ${}^1D$ SS and  ${}^H$ SS did better at discriminating hierarchical  
319 stepping-stone model from other scenarios (Fig. 1, Table S2).



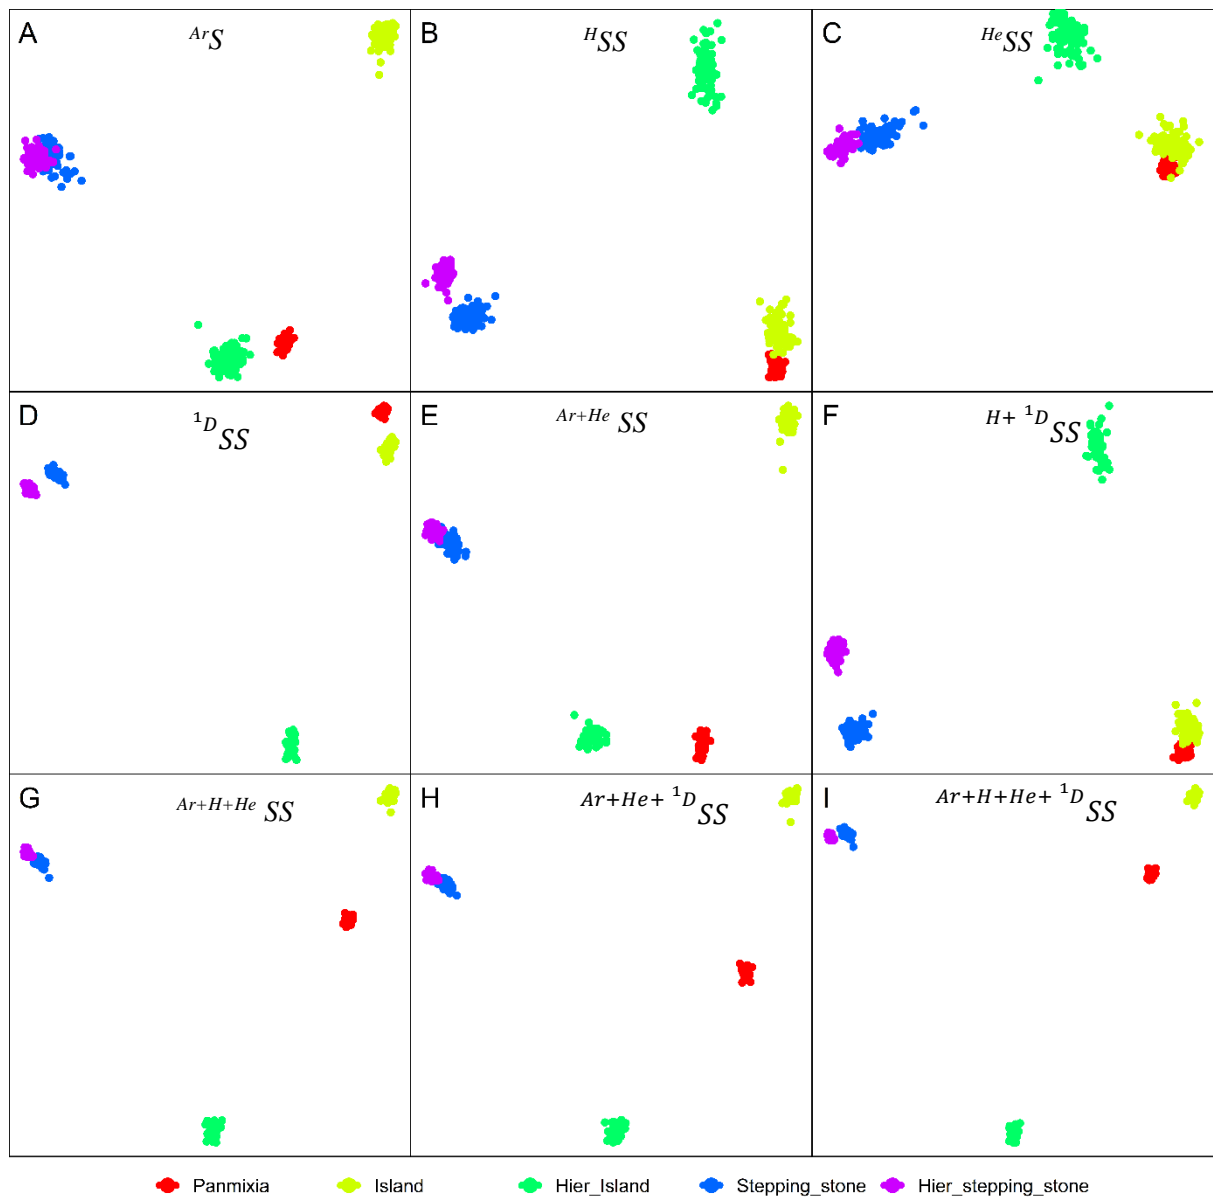

320

321 Fig. 1. Projections of 5 spatial scenarios into two-dimensional subspaces using KLFDA based on  
 322 different sets of summary statistics: (A)  $ArSS$ , (B)  $HSS$ , (C)  $HeSS$ , (D)  ${}^1DSS$ , (E)  $Ar+HeSS$ , (F)  $H+{}^1DSS$ .  
 323 (G)  $Ar+H+HeSS$ , (H)  $Ar+He+{}^1DSS$ , (I)  $Ar+H+He+{}^1DSS$ . Each dot represents a simulated data set.

### 324 Conditional Random Forest Classification

325 As is the case for KLFDA, among all the sets of summary statistics,  $HeSS$  had the lowest  
 326 classification accuracy (Table 3). Slightly different from KLFDA results,  ${}^1DSS$  and  $HSS$ ,  
 327 having the same discriminatory power, outclassed  $ArSS$  and  $HeSS$  in discriminating the five

328 scenarios (Table 3). Note that conditional random forest didn't show a power difference  
 329 between  ${}^1DSS$  and  ${}^HSS$ , as well as between  ${}^{Ar+H+He}SS$ ,  ${}^{Ar+He+{}^1D}SS$ , and  ${}^{Ar+H+He+{}^1D}SS$  (Table 3).  
 330 Compared to KLFDA, the discriminatory power of all sets of summary statistics to  
 331 discriminate spatial scenarios increased when using conditional random forest (Table 3).  
 332 Moreover, as opposed to KLFDA results, combining different sets of summary statistics led  
 333 to an increase in discriminatory power (Table 3). The most difficult scenario to identify is the  
 334 stepping-stone model. However, consistent with KLFDA results,  ${}^{Ar}SS$  showed the worse  
 335 performance to distinguish the stepping-stone scenario than  ${}^HSS$ ,  ${}^1DSS$  and  ${}^{He}SS$  (Table S3).  
 336  ${}^{He}SS$  did a worse job at identifying hierarchical stepping-stone model compared to  ${}^{Ar}SS$ ,  ${}^HSS$ ,  
 337 and  ${}^1DSS$  (Table S3).

338 **Table 3.** The performance of different sets of summary statistics in discriminating five spatial  
 339 scenarios using conditional random forest classification

| Summary statistics    | ${}^{Ar}SS$      | ${}^HSS$         | ${}^{He}SS$      | ${}^1DSS$        | ${}^{Ar+He}SS$  | ${}^{H+{}^1D}SS$ | ${}^{Ar+H+He}SS$ | ${}^{Ar+He+{}^1D}SS$ | ${}^{Ar+H+He+{}^1D}SS$ |
|-----------------------|------------------|------------------|------------------|------------------|-----------------|------------------|------------------|----------------------|------------------------|
| <b>Accuracy (Acc)</b> | 0.96             | 0.972            | 0.958            | 0.972            | 0.97            | 0.978            | <b>0.986</b>     | <b>0.986</b>         | <b>0.986</b>           |
| <b>Acc 95% CI</b>     | (0.9389, 0.9754) | (0.9535, 0.9846) | (0.9365, 0.9738) | (0.9535, 0.9846) | (0.951, 0.9831) | (0.961, 0.989)   | (0.9714, 0.9944) | (0.9714, 0.9944)     | (0.9714, 0.9944)       |
| <b>Kappa</b>          | 0.95             | 0.965            | 0.9475           | 0.965            | 0.9625          | 0.9725           | 0.9825           | 0.9825               | 0.9825                 |

340 Acc: Accuracy; Acc 95% CI: the 95% interval of accuracy; Kappa: Cohen's kappa coefficient ( $\kappa$ ).

341

342

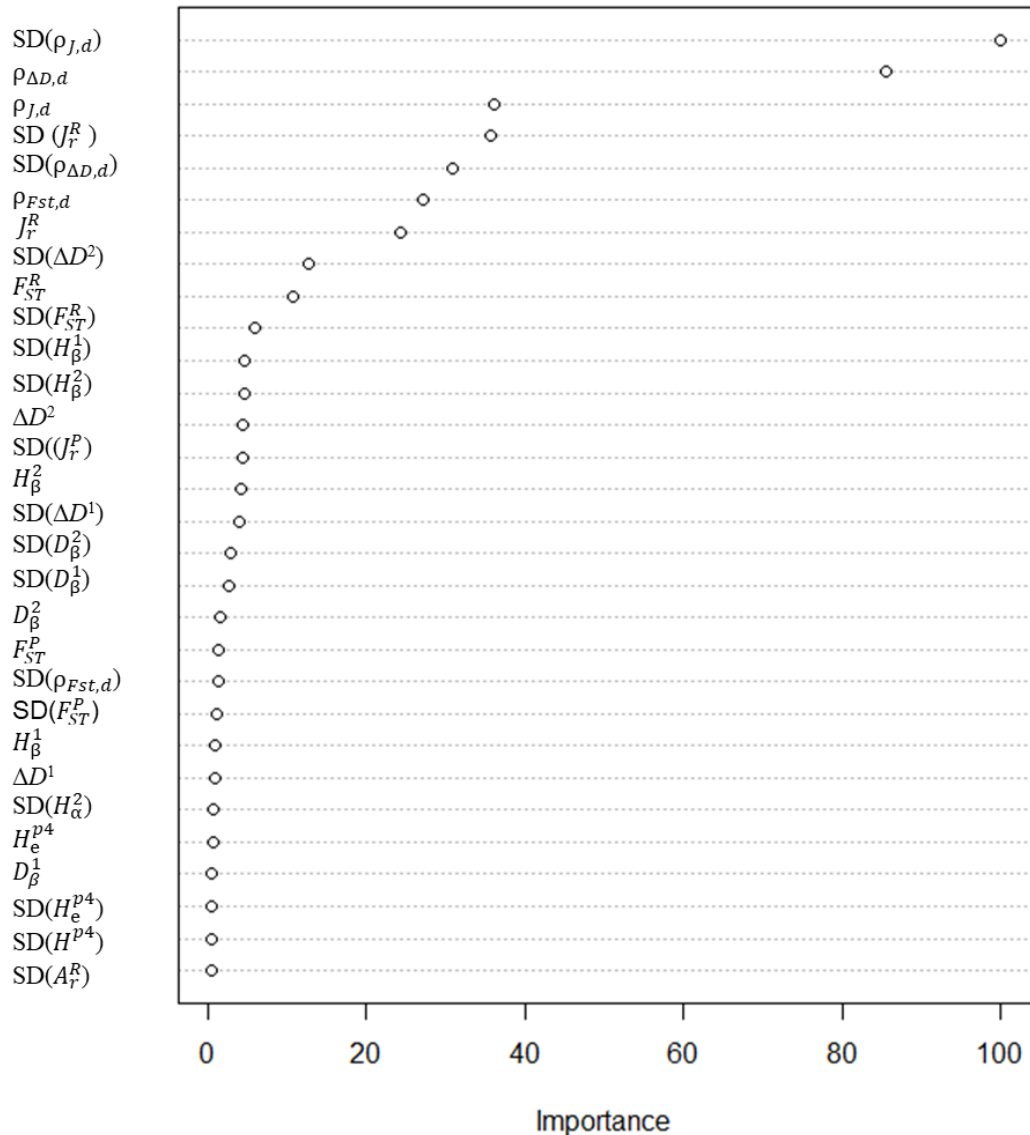

343

344 **Fig. 2.** Ranked conditional variable importance estimated by conditional random forest  
 345 classification. Results are shown only for the top 30 most important summary statistics among the 178  
 346 summary statistics. Statistics abbreviations are given in Table S1.

347

348 A particular advantage of random forest classification is that it allows us to rank individual  
 349 summary statistics in terms of their discriminating power. Figure 2 presents the top 30 ranked  
 350 summary statistics among the total 178 summary statistics including  $ArSS$ ,  $HSS$ ,  $HeSS$ , and  
 351  $^1DSS$ . The best performing statistics in discriminating the spatial scenarios were the  $\beta$ -  
 352 measures and their Mantel statistics ( $\rho$ ). Among all the summary statistics,  $SD(\rho_{J,d})$

353 (belonging to  $^{Ar} SS$ ) and  $\rho_{\Delta D,d}$  (belonging to  $^{1D} SS$ ) were the two most important statistics  
354 contributing to the ability to discriminate among all spatial scenarios (Fig. 2). Four out of the  
355 top-ten ranked statistics,  $SD(\rho_{J,d})$ ,  $\rho_{J,d}$ ,  $SD(J_r^R)$ , and  $J_r^R$ , accounting for first, third, fourth,  
356 and seventh best-performing statistics respectively, belong to  $^{Ar} SS$ . Three out of the top-ten  
357 ranked statistics,  $\rho_{\Delta D,d}$ ,  $SD(\rho_{\Delta D,d})$ , and  $SD(\Delta D^2)$  from  $^{1D} SS$  and  $^H SS$ , accounted for the  
358 second, fifth, and eighth most important statistics respectively. The last three statistics out of  
359 the top-ten,  $\rho_{Fst,d}$ ,  $F_{ST}^R$ , and  $SD(F_{ST}^R)$ , which belong to  $^{He} SS$ , had relatively low importance  
360 when compared to  $^{Ar} SS$  and  $^{1D} SS$  and ranked as the sixth, ninth, and tenth best-performing  
361 statistics respectively (Fig. 2).

## 362 **Deep neural network**

363 The deep neural network analysis produced results similar to those of the two previous  
364 methods. Generally, the summary statistics can be categorized into four discriminatory sets  
365 based on discriminatory power. Again,  $^{1D} SS$ , the most powerful summary statistics, along  
366 with  $^{Ar+He+^{1D}} SS$ , outclassed other sets of summary statistics (Table 4).  $^{Ar} SS$ ,  $^H SS$  and  
367  $^{Ar+H+He} SS$ , comprised the second most discriminatory sets of summary statistics, with their  
368 discriminant accuracy being only slightly lower than  $^{1D} SS$  (0.988, Table 4). The third most  
369 discriminatory sets of summary statistics were  $^{Ar+He} SS$ ,  $^{H+D} SS$ , and  $^{Ar+H+He+^{1D}} SS$ . Finally,  
370 the least discriminatory set of summary statistics was  $^{He} SS$  (Table 4). As it was the case with  
371 KLFDA, neural network results indicated that combining different sets of summary statistics  
372 (increasing the number of summary statistics) did not increase discriminatory power (Table  
373 4).

374 **Table 4.** Performance of different sets of summary statistics in discriminating five spatial  
 375 scenarios using deep neural network  
 376

| Summary statistics | $ArSS$           | $HSS$            | $HeSS$           | $I_DSS$          | $Ar+HeSS$        | $H+I_DSS$        | $Ar+H+HeSS$      | $Ar+He+I_DSS$    | $Ar+H+He+I_DSS$  |
|--------------------|------------------|------------------|------------------|------------------|------------------|------------------|------------------|------------------|------------------|
| Accuracy (Acc)     | 0.988            | 0.988            | 0.974            | <b>0.99</b>      | 0.986            | 0.986            | 0.988            | <b>0.99</b>      | 0.986            |
| Acc 95% CI         | (0.9741, 0.9956) | (0.9741, 0.9956) | (0.9559, 0.9861) | (0.9768, 0.9967) | (0.9714, 0.9944) | (0.9714, 0.9944) | (0.9741, 0.9956) | (0.9768, 0.9967) | (0.9714, 0.9944) |
| Kappa              | 0.985            | 0.985            | 0.9675           | 0.9875           | 0.9825           | 0.9825           | 0.985            | 0.9875           | 0.9825           |

377 Acc: Accuracy; Acc 95% CI: the 95% interval of accuracy; Kappa: Cohen's kappa coefficient ( $\kappa$ ).

378 The discriminatory power of all sets of summary statistics using the neural network was  
 379 higher than that of KLFDA and CRFC (Tables 2-4). This indicates that the neural network  
 380 performed better than the two other ML methods. Unlike KLFDA and CRFC, the deep neural  
 381 network did better at discriminating between panmixia and island model, with most sets of  
 382 summary statistics (except  $HeSS$ ) 100 % successfully discriminating between these two  
 383 scenarios (Table S4).  $Ar+He+I_DSS$  and  $Ar+H+HeSS$  did a better job (0.2% error rate) in  
 384 differentiating the stepping-stone model and hierarchical stepping-stone model compared to  
 385 other sets of summary statistics (Table S4).

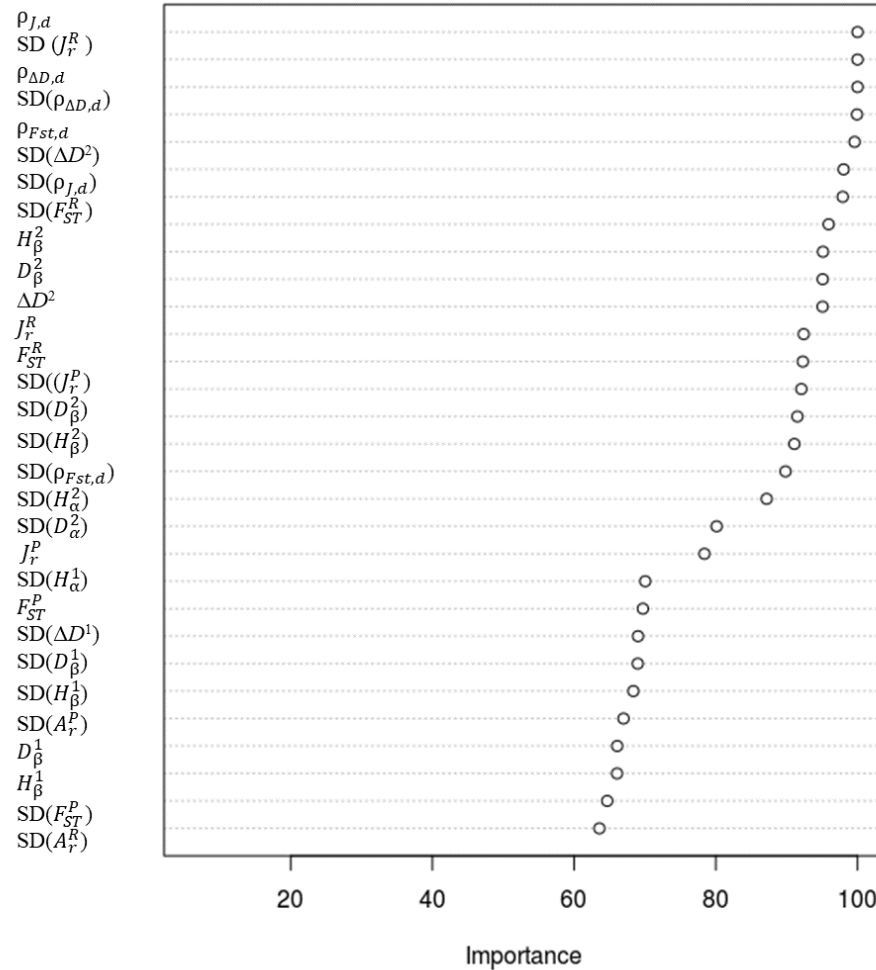

386

387 **Fig. 3.** Variable importance estimated using the deep neural network. Results are shown only for the  
 388 top 30 ranked summary statistics among the 178 summary statistics. Statistics abbreviations are given  
 389 in Table S1.

390 Figure 3 presents the variable importance of the top 30 ranked summary statistics among the  
 391 total 178 summary statistics according to their discriminatory power estimated from the deep

392 neural network.  $H$ SS,  ${}^1D$ SS,  ${}^Ar$ SS, and  ${}^{He}$ SS accounted for 11/30 (5 overlapped statistics

393 with  ${}^1D$ SS), 10/30, 8/30, and 6/30 of the top-30 ranked summary statistics respectively (Fig.

394 3). The first three most informative summary statistics were  $\rho_{J,d}$ ,  $SD(J_r^R)$  and  $\rho_{\Delta D,d}$ . They

395 contributed equally toward the ability to discriminate among all spatial scenarios (importance

396 values are all 100, Figs. 3 & S1). Similar to CRFC results, among the top 10 most

397 informative statistics, the first ( $\rho_{J,d}$ ), second ( $SD(J_r^R)$ ), and the seventh ( $SD(\rho_{J,d})$ ) most  
398 important statistics belong to  $^{Ar}SS$ .  $\rho_{\Delta D,d}$ ,  $SD(\rho_{\Delta D,d})$ ,  $SD(\Delta D^2)$ , and  $D_\beta^2$ , which were the  
399 third, fourth, sixth, and tenth best-performing summary statistics respectively, belong to  
400  $^{1D}SS$ . Only two out of ten best-performing statistics,  $\rho_{Fst,d}$  and  $SD(F_{ST}^R)$ , ranking as the fifth  
401 and the eighth-most important summary statistic respectively, belong to  $^{He}SS$  (Fig. 3).

402 Figure S1 presents the scenario-specific variable importance ranked in accordance with their  
403 overall importance (c.f., Fig. 3). The 16 top summary statistics contributed almost equally to  
404 panmixia, stepping-stone model, hierarchical stepping-stone model and hierarchical island  
405 model (Fig. S1). On the other hand, only the top five statistics,  $\rho_{J,d}$ ,  $SD(J_r^R)$ ,  $\rho_{\Delta D,d}$ ,  
406  $SD(\rho_{\Delta D,d})$ ,  $\rho_{Fst,d}$ , contributed most to the power of discriminating the island model from  
407 other models (Fig. S1). Besides the top 16 most important statistics,  $J_r^R$  and  $F_{ST}^P$  also  
408 contributed substantially to the power of discriminating stepping-stone and hierarchical  
409 stepping-stone models (Fig. S1).

410

411

## 412 Discussion

413 In this study, we performed a comprehensive assessment of the discriminatory power of 9  
414 sets of summary statistics, comprised of  $A_rSS$ ,  $HSS$ ,  $HeSS$  and  ${}^1DSS$ . Since different methods to  
415 estimate discriminatory power may lead to different results, we employed three up-to-date  
416 machine learning methods to compare the power of the different sets of summary statistics.  
417 All results led to the same conclusion that  ${}^1DSS$  outperformed the other sets of summary  
418 statistics in the discrimination of spatial-structure scenarios. Though,  ${}^1DSS$ , was overall the  
419 best set of diversity measures, without undue emphasising on rare or common entities,  $A_rSS$   
420 and  $HeSS$  also provided complementary information that  ${}^1DSS$  did not capture.

421 Jaccard dissimilarity ( $J$ ) and its Mantel'  $r$  ranked as the top summary statistics among all the  
422 summary statistics for differentiating spatial scenarios, followed by  $\Delta D$  and then  $F_{ST}$  as well  
423 as their Mantel's  $r$ . In addition, we found that combining sets of summary statistics did not  
424 necessarily increase discriminatory power (e.g., KLFDA and neural network models in  
425 Tables 2 & 4). Therefore, a more efficient strategy would be combining the most informative  
426 summary statistics in each set depending on the alternative spatial scenarios that could apply  
427 to each dataset based on existing information.

428 During the past 20 years, evolutionary biologists and population geneticists have been using  
429 diversity metrics as the summary statistics to make inference on the evolutionary and  
430 demographic histories of populations via approximate Bayesian computation (ABC).  
431 Information theory offers a spectrum of summary statistics that can be used with ABC.  
432 However, the choice of summary statistics in population genetics has focused on the  $HeSS$   
433 family (i.e., heterozygosity,  $He$ , and fixation,  $F_{st}$ ). The use of  $HeSS$  up-weight the signal  
434 provided by common alleles while down-weighting rare alleles, thus it may miss important



435 information under scenarios that involve bottlenecks or founder events. To avoid this  
436 problem, it is common to combine  $^{Ar}SS$  and  $^{He}SS$ , however, our results indicate that the same  
437 or more discriminatory power could be obtained using only the  $^{1D}SS$  set. These results  
438 provide further support for the idea that simply increasing the number of summary statistics  
439 without considering their individual discriminatory power may decrease the inference  
440 accuracy.

441 Our systematic assessment of the power of these summary statistics showed that,  $^{He}SS$ , the  
442 most commonly used set of summary statistics in population genetics performed worst in the  
443 discrimination of typical spatial-structure scenarios tested by three different classification  
444 approaches.  $J$ ,  $\Delta D$ , and  $F_{ST}$  are  $\beta$ -diversity measures evaluating the extent of genetic  
445 differentiation between populations, with  $\Delta D$  and  $F_{ST}$  being estimated based on allele  
446 frequency, and  $J$  being estimated based on allele presence/absence data. Generally, genetic  
447 differentiation is usually estimated using  $F_{ST}$  (Wright 1949) and its variants ( $G_{ST}$  (Nei 1973))  
448 calculated from heterozygosity ( $He$ ) while  $J$  and  $\Delta D$ , which are more informative according  
449 to our results, are rarely used as statistics to measure population genetic inference.

450 Our results indicate that  $^{Ar}SS$  contributed better to differentiate between panmixia and the  
451 other scenarios.  $^{1D}SS$  on the other hand, exhibits high accuracy in differentiating all  
452 scenarios, especially being good at discriminating between stepping-stone and hierarchical  
453 stepping-stone models. Therefore,  $^{Ar}SS$  seems useful for detecting the scenarios that depart  
454 from panmixia, and  $^{1D}SS$  may be helpful to differentiate between more complex spatial  
455 scenarios. On the other hand, we did not observe advantageous properties in  $^{He}SS$  in detecting  
456 the spatial structuring signals under the five spatial scenarios considered. Though  $\Delta D$  showed  
457 high power of detecting the signal of the spatial structure changes, there is still a lack of

458 knowledge about the relationship between  $\Delta D$  and demographic parameters, as well as  $\Delta D$ 's  
459 response to selection.

460 For a long time, important guidelines for species and genetic diversity conservation have  
461 been made using the richness and Simpson index in terms of species diversity (Scott *et al.*  
462 1987; Jost *et al.* 2010), and heterozygosity (derived from  $F$ -statistics framework) in terms of  
463 genetic diversity (Aitken, Luikart & Allendorf 2012). The results of this study suggest that  
464 summary statistics based on Hill's numbers are promising tools for detecting diversity  
465 changes in biological conservation studies.

466 In summary, diversity of order  $q = 1$  ( ${}^1D$ ) and Shannon differentiation offer a unified approach  
467 integrating diversity across all levels of biological organizations. Our results suggest that  
468  ${}^1D$   $SS$  would perform well for the purpose of inference of population structure using  
469 inferential frameworks such as approximate Bayesian computation (ABC). It is clear that no  
470 single set of diversity measures can capture all the information contained in raw population  
471 genetics datasets and our study suggest that the type of summary statistic we may want to use  
472 depends on the specific question being asked.

473 Finally, we found different machine learning methods showed different performance to  
474 distinguish spatial structure scenarios. KLFDA gave the lowest discriminant accuracy while  
475 the deep neural network gave the highest discriminant accuracy among the three  
476 classification methods (Tables 2-4). In contrast, conditional random forest did not show the  
477 difference between the power of  ${}^HSS$  and  ${}^1D$   $SS$  as well as other combinations of summary  
478 statistics (Table 3). The conditional random forest also showed lower power to identify the  
479 importance of summary statistics compared to neural networks (Figs. 2-3). The deep neural  
480 network showed more advantages than KLFDA and conditional random forest in this study,

481 which provides additional support to recent assertions that machine learning methods  
482 represent promising tools to carry out inference in ecology and evolution (Schrider & Kern  
483 2018).

#### 484 **Data and code availability**

485 The input files and scripts for generating simulation as well as the analyses of summary  
486 statistics are available at [https://github.com/xinghuq/SS\\_performance](https://github.com/xinghuq/SS_performance).

#### 487 **Acknowledgments**

488 XHQ was supported by China Scholarship Council.

#### 489 **Author contribution**

490 XQ and OEG designed the study. XQ carried out the analyses and interpreted results with the  
491 input from OEG. XQ wrote the manuscript with the input of OEG. Both authors contributed  
492 to editing and revising the manuscript.

#### 493 **Conflict of interest**

494 The authors declare that they have no conflict of interests.

495

#### 496 **References**

- 497 Aitken, S.N., Luikart, G. & Allendorf, F.W. (2012) *Conservation and the genetics of populations*. John  
498 Wiley & Sons.
- 499 Alvarado-Serrano, D.F. & Hickerson, M.J. (2016) Spatially explicit summary statistics for historical  
500 population genetic inference. *Methods in Ecology and Evolution*, **7**, 418-427.
- 501 Baum, E.B. (1988) On the capabilities of multilayer perceptrons. *Journal of complexity*, **4**, 193-215.
- 502 Chao, A., Chiu, C.-H. & Jost, L. (2014) Unifying species diversity, phylogenetic diversity, functional  
503 diversity, and related similarity and differentiation measures through Hill numbers. *Annual  
504 Review of Ecology, Evolution, and Systematics*, **45**, 297-324.
- 505 Cohen, J. (1960) A coefficient of agreement for nominal scales. *Educational and psychological  
506 measurement*, **20**, 37-46.
- 507 Csilléry, K., Blum, M.G., Gaggiotti, O.E. & François, O. (2010) Approximate Bayesian computation  
508 (ABC) in practice. *Trends in Ecology & Evolution*, **25**, 410-418.
- 509 Day, T. (2015) Information entropy as a measure of genetic diversity and evolvability in colonization.  
510 *Molecular Ecology*, **24**, 2073-2083.
- 511 Excoffier, L., Dupanloup, I., Huerta-Sánchez, E., Sousa, V.C. & Foll, M. (2013) Robust demographic  
512 inference from genomic and SNP data. *PLoS Genet*, **9**, e1003905.

- 513 Excoffier, L. & Foll, M. (2011) Fastsimcoal: a continuous-time coalescent simulator of genomic  
514 diversity under arbitrarily complex evolutionary scenarios. *Bioinformatics*, **27**, 1332-1334.
- 515 Fortuna, M.A., Albaladejo, R.G., Fernández, L., Aparicio, A. & Bascompte, J. (2009) Networks of  
516 spatial genetic variation across species. *Proceedings of the National Academy of Sciences*,  
517 **106**, 19044-19049.
- 518 Gaggiotti, O.E., Chao, A., Peres-Neto, P., Chiu, C.H., Edwards, C., Fortin, M.J., Jost, L., Richards, C.M.  
519 & Selkoe, K.A. (2018) Diversity from genes to ecosystems: A unifying framework to study  
520 variation across biological metrics and scales. *Evolutionary Applications*.
- 521 Garson, D.G. (1991) Interpreting neural network connection weights. *Artificial Intelligence Expert*, **6**,  
522 46-51.
- 523 Gevrey, M., Dimopoulos, I. & Lek, S. (2003) Review and comparison of methods to study the  
524 contribution of variables in artificial neural network models. *Ecological Modelling*, **160**, 249-  
525 264.
- 526 Guarnieri, S., Piazza, F. & Uncini, A. (1999) Multilayer feedforward networks with adaptive spline  
527 activation function. *IEEE Transactions on Neural Networks*, **10**, 672-683.
- 528 Hampe, J., Schreiber, S. & Krawczak, M. (2003) Entropy-based SNP selection for genetic association  
529 studies. *Human Genetics*, **114**, 36-43.
- 530 Hill, M.O. (1973) Diversity and evenness: a unifying notation and its consequences. *Ecology*, **54**, 427-  
531 432.
- 532 Hothorn, T., Hornik, K., Strobl, C. & Zeileis, A. (2010) Party: A laboratory for recursive partytioning.
- 533 Jaccard, P. (1912) The distribution of the flora in the alpine zone. 1. *New Phytologist*, **11**, 37-50.
- 534 Jost, L. (2006) Entropy and diversity. *Oikos*, **113**, 363-375.
- 535 Jost, L. (2008) GST and its relatives do not measure differentiation. *Molecular Ecology*, **17**, 4015-  
536 4026.
- 537 Jost, L., DeVries, P., Walla, T., Greeney, H., Chao, A. & Ricotta, C. (2010) Partitioning diversity for  
538 conservation analyses. *Diversity and Distributions*, **16**, 65-76.
- 539 Kohavi, R. (1995) A study of cross-validation and bootstrap for accuracy estimation and model  
540 selection. *Ijcai*, pp. 1137-1145. Montreal, Canada.
- 541 Kuhn, M. (2008) Building predictive models in R using the caret package. *Journal of Statistical*  
542 *Software*, **28**, 1-26.
- 543 Kuhn, M. (2012) The caret package. *R Foundation for Statistical Computing, Vienna, Austria*. URL  
544 [https://cran.r-project.org/package= caret](https://cran.r-project.org/package=caret).
- 545 Kuhn, M. (2015) Caret: classification and regression training. *Astrophysics Source Code Library*.
- 546 Kuhn, M. & Johnson, K. (2013) *Applied predictive modeling*. Springer.
- 547 Lande, R. (1996) Statistics and partitioning of species diversity, and similarity among multiple  
548 communities. *Oikos*, 5-13.
- 549 Lankau, R.A. & Strauss, S.Y. (2007) Mutual feedbacks maintain both genetic and species diversity in a  
550 plant community. *Science*, **317**, 1561-1563.
- 551 Ma, L., Ji, Y.-J. & Zhang, D.-X. (2015) Statistical measures of genetic differentiation of populations:  
552 Rationales, history and current states. *Current Zoology*, **61**, 886-897.
- 553 Nei, M. (1973) Analysis of gene diversity in subdivided populations. *Proceedings of the National*  
554 *Academy of Sciences*, **70**, 3321-3323.
- 555 Nekola, J.C. & White, P.S. (1999) The distance decay of similarity in biogeography and ecology.  
556 *Journal of Biogeography*, **26**, 867-878.
- 557 Novembre, J. & Stephens, M. (2008) Interpreting principal component analyses of spatial population  
558 genetic variation. *Nature genetics*, **40**, 646-649.
- 559 Qin, X. (2019) HierDpart v0. 3.5.
- 560 Ricotta, C. (2005) On hierarchical diversity decomposition. *Journal of vegetation science*, **16**, 223-  
561 226.
- 562 Ripley, B.D. & Hjort, N. (1996) *Pattern recognition and neural networks*. Cambridge university press.

- 563 Schaffer, C. (1993) Selecting a classification method by cross-validation. *Machine learning*, **13**, 135-  
564 143.
- 565 Schrider, D.R. & Kern, A.D. (2018) Supervised machine learning for population genetics: a new  
566 paradigm. *Trends in Genetics*, **34**, 301-312.
- 567 Scott, J.M., Csuti, B., Jacobi, J.D. & Estes, J.E. (1987) Species richness. *BioScience*, **37**, 782-788.
- 568 Sherwin, W.B., Chao, A., Jost, L. & Smouse, P.E. (2017) Information theory broadens the spectrum of  
569 molecular ecology and evolution. *Trends in Ecology & Evolution*, **32**, 948-963.
- 570 Stotz, G.C., Gianoli, E. & Cahill, J.F. (2016) Spatial pattern of invasion and the evolutionary responses  
571 of native plant species. *Evolutionary Applications*, **9**, 939-951.
- 572 Strobl, C., Boulesteix, A.-L., Kneib, T., Augustin, T. & Zeileis, A. (2008) Conditional variable  
573 importance for random forests. *BMC bioinformatics*, **9**, 307.
- 574 Strobl, C., Boulesteix, A.-L., Zeileis, A. & Hothorn, T. (2007) Bias in random forest variable importance  
575 measures: Illustrations, sources and a solution. *BMC bioinformatics*, **8**, 25.
- 576 Sugiyama, M. (2007) Dimensionality reduction of multimodal labeled data by local fisher  
577 discriminant analysis. *Journal of machine Learning research*, **8**, 1027-1061.
- 578 Tang, Y. & Li, W. (2016) Lfda: An R package for local fisher discriminant analysis and visualization.  
579 *arXiv preprint arXiv:1612.09219*.
- 580 Tang, Y. & Li, W. (2017) lfda: Local Fisher Discriminant Analysis in R.
- 581 Van Tienderen, P.H. (1991) Evolution of generalists and specialist in spatially heterogeneous  
582 environments. *Evolution*, 1317-1331.
- 583 Vellend, M. (2005) Species diversity and genetic diversity: parallel processes and correlated patterns.  
584 *The American Naturalist*, **166**, 199-215.
- 585 Wagner, A. (2017) Information theory, evolutionary innovations and evolvability. *Philosophical  
586 Transactions of the Royal Society B: Biological Sciences*, **372**, 20160416.
- 587 Wang, X., Wiegand, T., Wolf, A., Howe, R., Davies, S.J. & Hao, Z. (2011) Spatial patterns of tree  
588 species richness in two temperate forests. *Journal of Ecology*, **99**, 1382-1393.
- 589 Weir, B.S. & Cockerham, C.C. (1984) Estimating F-statistics for the analysis of population structure.  
590 *Evolution*, **38**, 1358-1370.
- 591 Wright, S. (1949) The genetical structure of populations. *Annals of eugenics*, **15**, 323-354.
- 592
